# Supplementary material
Source: HighWire-hosted journal article supplement (http://www.jneurosci.org/highwire/filestream/598355/field_highwire_adjunct_files/3/Supplemental_Fig_4.pdf)

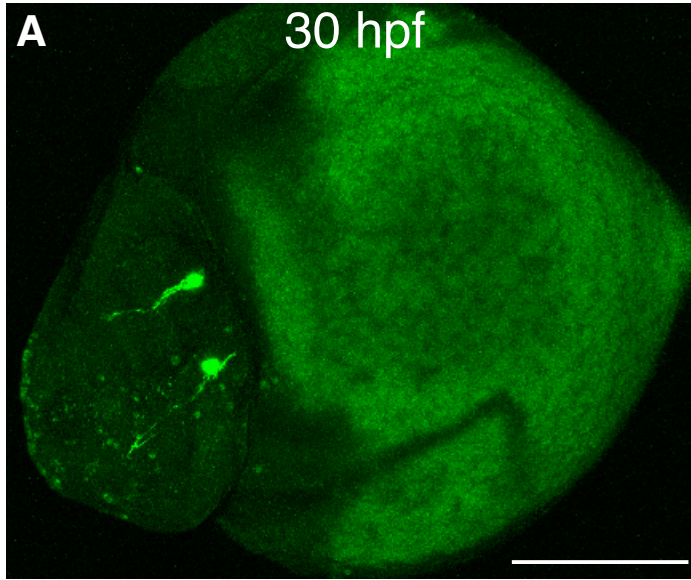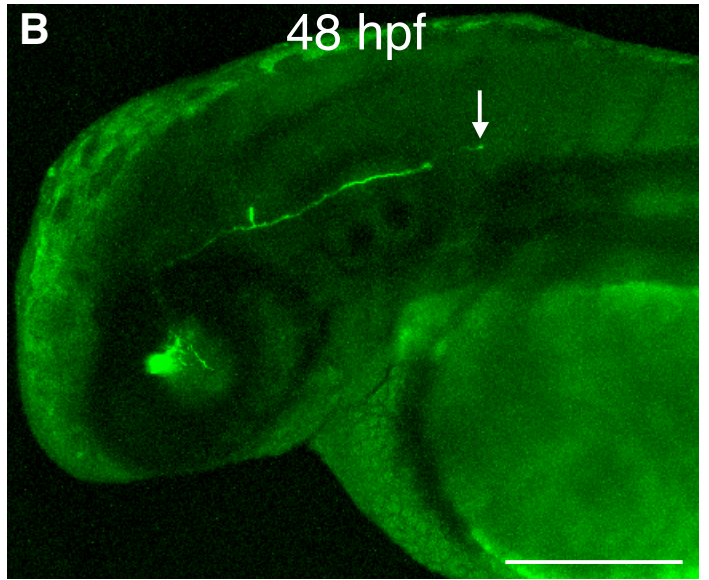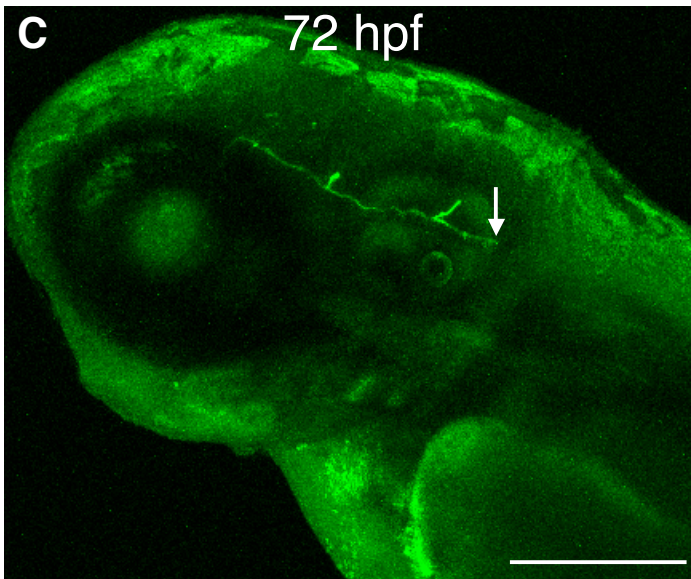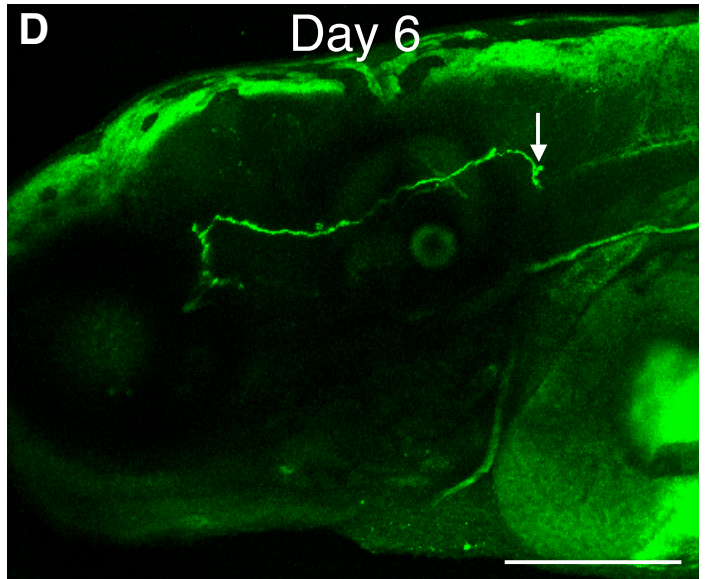

Supplement: Supplemental_Fig_4.pdf [file Supplemental_Fig_4.pdf]
